# Supplementary material
Source: publisher figshare collection journal article supplement (https://tandf.figshare.com/ndownloader/files/14425241)
Supplement: Supplementary file 1 [file 14425241]

**Colonization and growth of dehalorespiring biofilms on carbonaceous sorptive amendments**

Staci L. Capozzi1,4 Coline Bodenreider1, Ana Prieto2, Rayford B. Payne3, Kevin R. Sowers3, Birthe Veno Kjellerup1*

1 Department of Civil and Environmental Engineering, University of Maryland, College Park, MD ([coline.bodenreider@laposte.net](mailto:coline.bodenreider@laposte.net), [bvk@umd.edu](mailto:bvk@umd.edu))

2 Department of Civil Engineering, Universidad de Chile, Santiago, Chile ([ana.prieto@uchile.cl](mailto:ana.prieto@uchile.cl))

3 Department of Marine Biotechnology, Institute of Marine and Environmental Technology, University of Maryland Baltimore County, Baltimore, MD ([payner@umbc.edu](mailto:payner@umbc.edu), [sowers@umbc.edu](mailto:sowers@umbc.edu))

4 Geosyntec Consultants, Columbia, Maryland 21046 ([scapozzi@geosyntec.com](mailto:scapozzi@geosyntec.com))

*Corresponding author. bvk@umd.edu

1147 Glenn L. Martin Hall

4298 Campus Dr.

College Park MD, 20742

Office: 301-314-1535

Email: bvk@umd.edu

**Keywords**

Dehalorespiring biofilms; Activated carbon; Polychlorinated biphenyls (PCBs); Quantitative Confocal laser scanning microscopy (Q-CLSM); Contaminated sediment.

**Journal:** Biofouling

**Supporting Information**

**
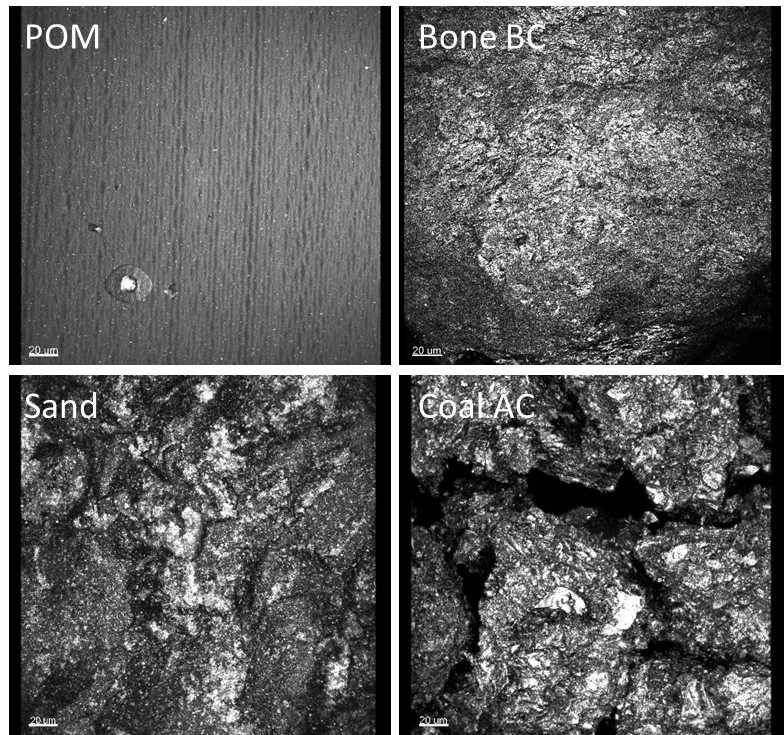
**

**Figure S1.** CLSM imaging of the negative controls of the applied materials: POM, Bone BC, sand and coal AC. The results showed that non-selective binding of SYBR Green nucleic acid stain to cellular materials and materials did not occur (n=5). Scale bar = 20 µm.


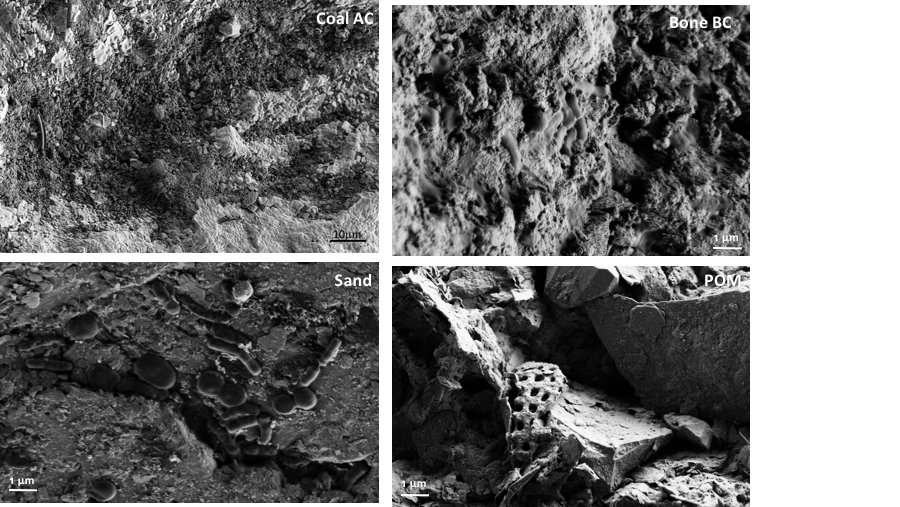


**Figure S2.** Scanning Electron Microscopy image showing *Dehalobium chlorocoercia* DF-1 biofilm formed on applied materials: POM, Bone BC, sand and coal AC. Images from Left to Right: The scale bar is 10 µm for Coal AC, 1 µm for Bone BC, 1 µm for Sand, and 1 µm for POM.
